# Supplementary material for: Total joint arthroplasty: practice variation of physiotherapy across the continuum of care in Alberta
Source: PubMed Central journal article supplement (PMC5095989; doi:10.1186/s12913-016-1873-9), 2016-11-04
Supplement: 12913_2016_1873_MOESM1_ESM.pdf [file 12913_2016_1873_MOESM1_ESM.pdf]

**1. In what region of the province do you primarily work?**

### Pre-operative Program

**2. Do you provide a pre-operative rehabilitation and/or education program for total hip/knee clients?**

- Yes  
 No

**3. What do you offer in you pre-operative program?**

- Education and Exercise  
 Education only

**4. What are the goals of your PRE-OPERATIVE program? Rank your responses with 1 being the highest priority and 4 being the lowest priority**

|                      |                    |                      |     |
|----------------------|--------------------|----------------------|-----|
| <input type="text"/> | Improving R.O.M    | <input type="text"/> | N/A |
| <input type="text"/> | Improving strength | <input type="text"/> | N/A |
| <input type="text"/> | Improving function | <input type="text"/> | N/A |
| <input type="text"/> | Pain control       | <input type="text"/> | N/A |

**5. What forms of exercise do you offer your clients? (Check all that apply)**

- UE/LE strengthening using free weights/bands/bodyweight/or machines  
 Functional training (i.e. stair walking, sit-stand)  
 Core exercises  
 Balance/weight transfer training  
 Cardio exercise  
 Other (please specify)

**6. What resources do you primarily use to guide your exercise intervention? (Check all that apply)**

- Past clinical experience  
 Established practice guidelines  
 Online exercise databases  
 Other (please specify)

**7. When planning exercise for clients, preference is given to:**

- Open kinetic chain exercises  
 Closed kinetic chain exercises  
 Both

**8. In what setting does the exercise take place?**

- A group setting  
 An individualized session  
 Both

**9. How far in advance of surgery is pre-operative exercise provided to your clients?**

## Pre-Operative Education

### 10. Please indicate the setting in which you provide pre-op rehabilitation/education:

- Hospital
- Client's home
- Community centre
- Outpatient clinic
- Other (please specify)

### 11. Which of the following professionals participate in the pre-op rehab program? (Check all that apply)

- Occupational Therapist
- Physical Therapist
- Therapy Assistant
- Social Worker
- Community Case Manager
- Nurse
- Physician/Surgeon
- Other (please specify)

### 12. During the pre-operative program, on which of the following do you provide education? (Check all that apply)

- Exercise
- Movement Precautions
- Meals and household management
- Equipment recommendations
- Transportation
- Car Transfers
- Performing transfers
- Emotional impact of undergoing procedure
- Ability to manage self-care
- Pain control
- Post-op medical protocols (i.e. administration of blood thinners)
- Average length of hospital stay
- Caregiver role
- Physical home environment (i.e. potential need to modify)
- Other (please specify)

### 13. Which of the following educational resources do you provide your clients with pre-operatively: (Check all that apply)

- Education booklet
- Exercise handouts
- Community service(s) information sheet
- Equipment list
- List of equipment loan cupboards and/or local medical equipment vendors
- Service provider phone number list
- Online resources
- Other (please specify)

**14. Does pre-operative education occur in:**

- A group setting
- An individualized session
- Both

**15. In what format is the session presented?**

- In person by health professionals
- In person by non-health professionals
- DVD format with questions afterward
- Other (please specify)

**16. How many people typically present to the group or individual?**

- 1 presenter
- 2 presenters
- More than 2 presenters
- Other (please specify)

**17. How many sessions does the individual attend?**

- 1
- 2 - 4
- 5 or more
- Other (please specify)

**18. Please identify which of the following elements your clients have an opportunity to practice, with a therapist, prior to their admission to hospital. (Check all that apply)**

- Exercise
- Adhering to movement precautions
- Proper use of gait aids
- Performing transfers
- Strategies to manage pain
- Other (please specify)

**19. Have you recently evaluated your client's satisfaction with your pre-op education program?**

- Yes
- No

**20. If "yes" when did you evaluate their satisfaction?**

- After the pre-operative program
- After the surgery
- Both

**21. Did you change any elements of your program as a result of client feedback?**

**22. How far in advance of surgery is pre-operative education provided to your clients?**

## Inpatient Acute Phase

**23. Do you provide acute in-patient care for patients with total hip/knee replacement surgeries?**

- Yes  
 No

**24. What are your goals for the IN-PATIENT acute phase? Rank your responses with 1 being the highest priority and 4 being the lowest priority**

|                      |                    |                          |     |
|----------------------|--------------------|--------------------------|-----|
| <input type="text"/> | Improving R.O.M    | <input type="checkbox"/> | N/A |
| <input type="text"/> | Improving strength | <input type="checkbox"/> | N/A |
| <input type="text"/> | Improving function | <input type="checkbox"/> | N/A |
| <input type="text"/> | Pain control       | <input type="checkbox"/> | N/A |

**25. Does your facility follow a care map or clinical pathway for all total hip/knee replacement surgeries?**

- Yes  
 No

**26. What is the average length of stay in DAYS for patients in acute care:**

Total Knee clients

Total Hip clients

**27. Indicate the number of times per day, on average, clients are seen by each of the following team members:**

|                                          | Visits per Day       |
|------------------------------------------|----------------------|
| Physical Therapist                       | <input type="text"/> |
| Occupational Therapist                   | <input type="text"/> |
| Therapy Assistant                        | <input type="text"/> |
| Recreation Therapist/<br>Health Care Aid | <input type="text"/> |

**28. Which are the following exercises are performed during in-patient stay? (Check all that apply)**

- Bed exercises  
 Seated exercises  
 Standing exercises

**29. How frequently are supervised exercises performed each day?**

- 1  
 2  
 3  
 4+

**30. How often are patients instructed to perform exercises independently each day?**

- 1  
 2  
 3  
 4  
 5+  
 Other (please specify)

**31. How many days after surgery are exercises initiated following total hip or knee replacement?**

- 0
- 1
- 2
- 3
- 4

**32. Is each patient required to walk daily?**

- Yes
- No

**33. If "Yes":**

How many times each day are clients assisted with walking?

On which day post-op is dangling initiated?

On which day post-op is walking initiated?

Other (please specify)

**34. Please indicate which of the following functions form the PRIMARY roles for each of the following team members:**

|                                      | Physical Therapy         | Therapy Assistant        |
|--------------------------------------|--------------------------|--------------------------|
| Discharge planning                   | <input type="checkbox"/> | <input type="checkbox"/> |
| Mobility (i.e. walking)              | <input type="checkbox"/> | <input type="checkbox"/> |
| Bed exercises                        | <input type="checkbox"/> | <input type="checkbox"/> |
| Transfers: Lie-Sit and Sit-Stand     | <input type="checkbox"/> | <input type="checkbox"/> |
| Caregiver education                  | <input type="checkbox"/> | <input type="checkbox"/> |
| Gathering info re: home environment  | <input type="checkbox"/> | <input type="checkbox"/> |
| Referral to in-and out-patient rehab | <input type="checkbox"/> | <input type="checkbox"/> |
| Education on care of the incision    | <input type="checkbox"/> | <input type="checkbox"/> |

Other (please specify)

**35. Following a normal care path, on which day post-operative are the following functions initiated post total hip or knee replacement?**

|                                      | Day                  |
|--------------------------------------|----------------------|
| Discharge planning                   | <input type="text"/> |
| Mobility (i.e. walking)              | <input type="text"/> |
| Bed exercises                        | <input type="text"/> |
| Seated exercises                     | <input type="text"/> |
| Standing exercises                   | <input type="text"/> |
| Transfers: Lie-Sit and Sit-Stand     | <input type="text"/> |
| Car transfers                        | <input type="text"/> |
| Caregiver education                  | <input type="text"/> |
| Gathering info re: home environment  | <input type="text"/> |
| Referral to in-and out-patient rehab | <input type="text"/> |
| Education on care of the incision    | <input type="text"/> |

**36. Please indicate which of the following modalities are used during the client's in-patient stay to manage pain and swelling: (Check all that apply)**

- |                                                   |                                           |
|---------------------------------------------------|-------------------------------------------|
| <input type="checkbox"/> Ice therapy              | <input type="checkbox"/> TENS             |
| <input type="checkbox"/> Heat therapy             | <input type="checkbox"/> Pain medications |
| <input type="checkbox"/> Elevation                | <input type="checkbox"/> CPM              |
| <input type="checkbox"/> Sequential Pressure cuff |                                           |
| <input type="checkbox"/> Other (please specify)   |                                           |

**37. Please indicate which of the following modalities are used to increase strength (Check all that apply):**

- Biofeedback
- Bed/seated/standing exercises
- Functional exercise (i.e. practicing transfers, functional activities, LE exercises)
- Muscle stimulation
- Other (please specify)

**38. Please identify the exercises typically used with patients: (Check all that apply)**

- Bed mobility exercises
- Bed exercises
- Seated exercises
- Standing exercises
- Gait exercises
- Stair walking
- ROM exercises
- Other (please specify)

**39. Please indicate which team members perform the following elements of discharge planning:**

|                                                             | Physical Therapist       | Occupational Therapist   | Community Case Manager   | Nurse                    | Social Worker            |
|-------------------------------------------------------------|--------------------------|--------------------------|--------------------------|--------------------------|--------------------------|
| Arranging equipment for client's home                       | <input type="checkbox"/> | <input type="checkbox"/> | <input type="checkbox"/> | <input type="checkbox"/> | <input type="checkbox"/> |
| Practicing stairs                                           | <input type="checkbox"/> | <input type="checkbox"/> | <input type="checkbox"/> | <input type="checkbox"/> | <input type="checkbox"/> |
| Evaluating ADL performance                                  | <input type="checkbox"/> | <input type="checkbox"/> | <input type="checkbox"/> | <input type="checkbox"/> | <input type="checkbox"/> |
| Addressing meals and household management                   | <input type="checkbox"/> | <input type="checkbox"/> | <input type="checkbox"/> | <input type="checkbox"/> | <input type="checkbox"/> |
| Making referral to community care (if needed)               | <input type="checkbox"/> | <input type="checkbox"/> | <input type="checkbox"/> | <input type="checkbox"/> | <input type="checkbox"/> |
| Referrals to in-patient/out-patient rehabilitation programs | <input type="checkbox"/> | <input type="checkbox"/> | <input type="checkbox"/> | <input type="checkbox"/> | <input type="checkbox"/> |
| Ensuring client has transportation home                     | <input type="checkbox"/> | <input type="checkbox"/> | <input type="checkbox"/> | <input type="checkbox"/> | <input type="checkbox"/> |

Other (please specify)

**\*40. Upon discharge, where are the total hip clients routinely referred to for post-discharge follow-up? Please rank the following from 1-3, with 1 being the most frequent referral made upon discharge and 3 indicating the least frequent discharge referral.**

|                      |                                             |                          |     |
|----------------------|---------------------------------------------|--------------------------|-----|
| <input type="text"/> | Out-patient Rehabilitation (hospital based) | <input type="checkbox"/> | N/A |
| <input type="text"/> | Privately run out-patient clinic            | <input type="checkbox"/> | N/A |
| <input type="text"/> | In-patient Rehabilitation Unit subacute     | <input type="checkbox"/> | N/A |

**\*41. Upon discharge, where are the total knee clients routinely referred to for post-discharge follow-up? Please rank the following from 1-4, with 1 being the most frequent referral made upon discharge and 4 indicating the least frequent discharge referral.**

|                      |                                             |                          |     |
|----------------------|---------------------------------------------|--------------------------|-----|
| <input type="text"/> | Community Therapy                           | <input type="checkbox"/> | N/A |
| <input type="text"/> | Out-patient Rehabilitation (hospital based) | <input type="checkbox"/> | N/A |
| <input type="text"/> | Privately run out-patient clinic            | <input type="checkbox"/> | N/A |
| <input type="text"/> | In-patient Rehabilitation Unit subacute     | <input type="checkbox"/> | N/A |

**42. Please provide the following information:**

Number of Occupational Therapists (in FTE's) working on in-patient orthopedic unit

Number of Physical Therapists (in FTE's) working on in-patient orthopedic unit

Number of Rehab Assistants (in FTE's) working on in-patient orthopedic unit

Average number of total joint clients admitted to unit on a MONTHLY basis

Total number of beds on in-patient orthopedic unit

## Outpatient Rehabilitation

**43. Do you offer out-patient rehabilitation?**

- Yes
- No

**\*44. What are the goals of your POST-OPERATIVE program? Rank your responses with 1 being the highest priority and 4 being the lowest priority.**

|                      |                    |                          |     |
|----------------------|--------------------|--------------------------|-----|
| <input type="text"/> | Improving R.O.M    | <input type="checkbox"/> | N/A |
| <input type="text"/> | Improving strength | <input type="checkbox"/> | N/A |
| <input type="text"/> | Improving function | <input type="checkbox"/> | N/A |
| <input type="text"/> | Pain control       | <input type="checkbox"/> | N/A |

**45. In which out-patient rehabilitation setting do you provide your services?**

- Private Clinic
- Hospital Based Setting
- Home care
- Other (please specify)

**46. Please indicate which of the following modalities are used in treating total joint replacement patients in the out-patient clinic: (Check all that apply)**

- Ice (bagged from machine)
- Cryocuff
- Ice packs
- Hot packs
- Muscle stimulation
- TENS
- Interferential Current
- Biofeedback
- Other (please specify)

**47. What forms of exercise do you offer your patients? (Check all that apply)**

- Strengthening exercises using free weights/bands/bodyweight/or machines
- Functional training (i.e. stair walking, sit-stand)
- Core exercises
- Balance/weight transfer training
- Cardio exercise

Other (please specify)

**48. What resources do you primarily use to guide your exercise intervention? (Check all that apply)**

- Past clinical experience
- Established practice guidelines
- Online exercise databases
- Other (please specify)

**49. When planning exercise for patients, preference is given to:**

- Open kinetic chain exercises
- Closed kinetic chain exercises
- Both

**50. Are patients seen in a group setting?**

|                    | Yes                   | No                    | N/A                   |
|--------------------|-----------------------|-----------------------|-----------------------|
| Total Hip clients  | <input type="radio"/> | <input type="radio"/> | <input type="radio"/> |
| Total Knee clients | <input type="radio"/> | <input type="radio"/> | <input type="radio"/> |

**51. If you answered “yes”, how many patients are seen per group?**

Total Hip group: number of clients per group:

Total Knee group: number of clients per group:

**52. Who is the PRIMARY person responsible for the bookings for appointments at your clinic? (Check all that apply)**

- Clerk/Admin Assistant
- Rehabilitation Assistant
- Physical Therapist or Occupational Therapist
- Other (please specify)

**53. If patients are seen for individual treatment sessions, what is the average number of treatment sessions provided?**

Total Hip clients: Avg number of sessions:

Total Knee clients: Avg number of sessions:



**54. How much time is scheduled for the following activities in your clinic?**

Total Hip clients: Initial assessment (in minutes per session)

Total Knee clients: Initial assessment (in minutes per session)

Total Hip clients: Follow-up visit (in minutes per session)

Total knee clients: Follow-up visit (in minutes per session)

**55. At which point in time, post-operatively, are patients seen in the out-patient clinic?**

Total Hip clients: average number of WEEKS post-op

Total Knee clients: average number of WEEKS post-op

**56. Do you have an established discharge criterion for total joint patients?**

Yes

No

**57. If yes, please share with us your discharge criterion for total hip/total knee patients:**

**58. Upon discharge from the out-patient program, do you refer any of your patients for follow-up in the community?**

Yes

No

Other (please specify)

**59. If "yes", where do you refer patients for follow-up? (Check all that apply)**

Private practice PT

Recreation Center

Home and Community Care

Other (please specify)
